# Supplementary material
Source: Springer Nature journal article supplement (https://www.springermedizin.de/resource/supplementary/12955_2010_722_MOESM1_ESM.pdf/9561180)
Supplement: MOESM1 [file 9561180]

1,857 potentially eligible articles of monitoring devices were identified and screened for retrieval

1,621 articles excluded based on abstract review

- Not relevant
- Review articles

236 articles retrieved for more detailed evaluation

98 articles additionally excluded

- Editorials
- Not relevant

138 articles using MEMS

127 articles additionally excluded

- No correlation information

11 articles included for meta-analysis:

- 7 studies reporting Pearson correlation coefficient
- 4 studies reporting Spearman rank correlation coefficient
